# Supplementary material
Source: publisher figshare collection journal article supplement (https://acs.figshare.com/ndownloader/files/7817767)
Supplement: Supplementary file 1 [file 7817767]

# Two finite binuclear $[M_2(\mu_2\text{-OH})(\text{COO})_2]$ (M = Co, Ni) based highly porous metal-organic frameworks with high performance of gas sorption and separation

*Jiantang Li, Xiaolong Luo, Nian Zhao, Lirong Zhang,\* Qisheng Huo and Yunling Liu\**

State Key Laboratory of Inorganic Synthesis and Preparative Chemistry, College of Chemistry, Jilin University, Changchun 130012, P. R. China

### S1. Calculation procedures of selectivity from IAST

The measured experimental data is excess loadings ( $q^{ex}$ ) of the pure components CO<sub>2</sub>, CH<sub>4</sub>, C<sub>2</sub>H<sub>6</sub> and C<sub>3</sub>H<sub>8</sub> for **ZSA-7**, **ZSA-8** and **ZSA-9**, which should be converted to absolute loadings ( $q$ ) firstly.

$$q = q^{ex} + \frac{pV_{pore}}{ZRT}$$

Here  $Z$  is the compressibility factor. The Peng-Robinson equation was used to estimate the value of compressibility factor to obtain the absolute loading, while the measure pore volume is also necessary.

The dual-site Langmuir-Freundlich equation is used for fitting the isotherm data at 298 K.

$$q = q_{m_1} \times \frac{b_1 \times p^{1/n_1}}{1 + b_1 \times p^{1/n_1}} + q_{m_2} \times \frac{b_2 \times p^{1/n_2}}{1 + b_2 \times p^{1/n_2}}$$

Here  $p$  is the pressure of the bulk gas at equilibrium with the adsorbed phase (kPa),  $q$  is the adsorbed

amount per mass of adsorbent (mol/kg),  $q_{m_1}$  and  $q_{m_2}$  are the saturation capacities of sites 1 and 2 (mol/kg),  $b_1$  and  $b_2$  are the affinity coefficients of sites 1 and 2 (1/kPa),  $n_1$  and  $n_2$  are the deviations from an ideal homogeneous surface.

The selectivity of preferential adsorption of component 1 over component 2 in a mixture containing 1 and 2, perhaps in the presence of other components too, can be formally defined as

$$S = \frac{q_1/q_2}{p_1/p_2}$$

$q_1$  and  $q_2$  are the absolute component loadings of the adsorbed phase in the mixture. These component loadings are also termed the uptake capacities. We calculate the values of  $q_1$  and  $q_2$  using the Ideal Adsorbed Solution Theory (IAST) of Myers and Prausnitz.

## S2. Supporting Figures

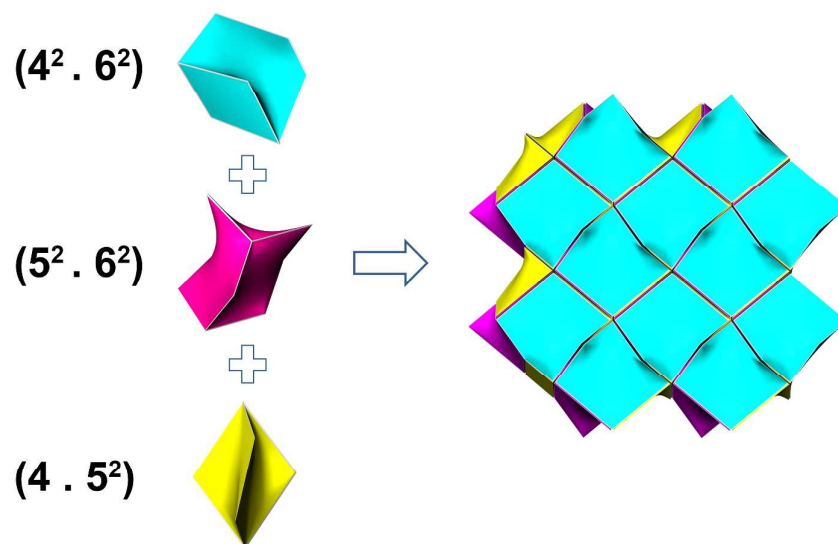

**Fig. S1** Topological features of **JLU-Liu37** and **JLU-Liu38** displayed by tiles and face symbols for blue, pink and yellow tiles are  $(4^2 \cdot 6^2)$ ,  $(5^2 \cdot 6^2)$  and  $(4 \cdot 5^2)$ .

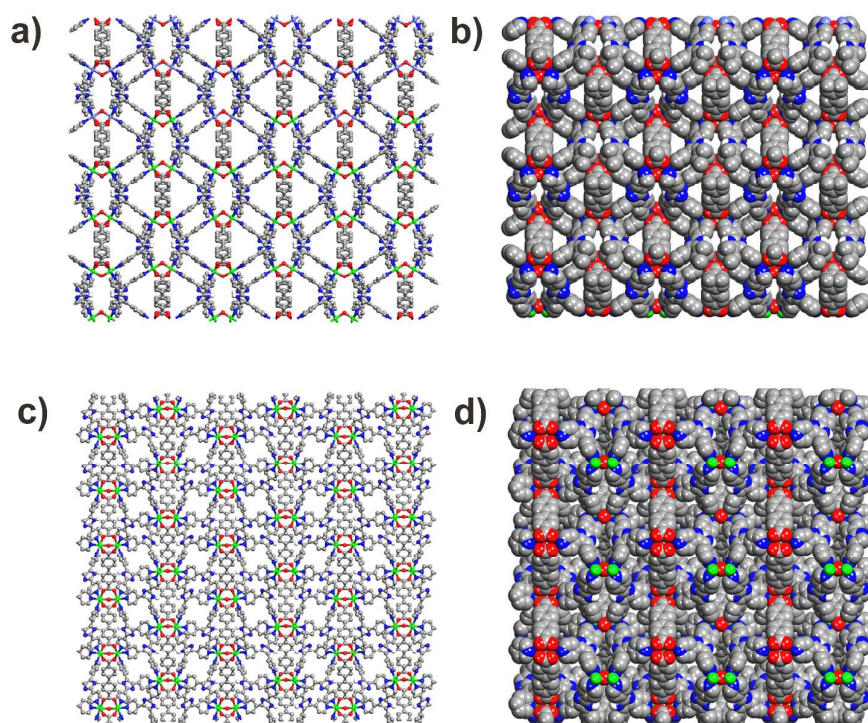

**Fig. S2** Ball-and-stick models and CPK models of **JLU-Liu37** and **JLU-Liu38** via X axis (a and b) and Y axis (c and d).

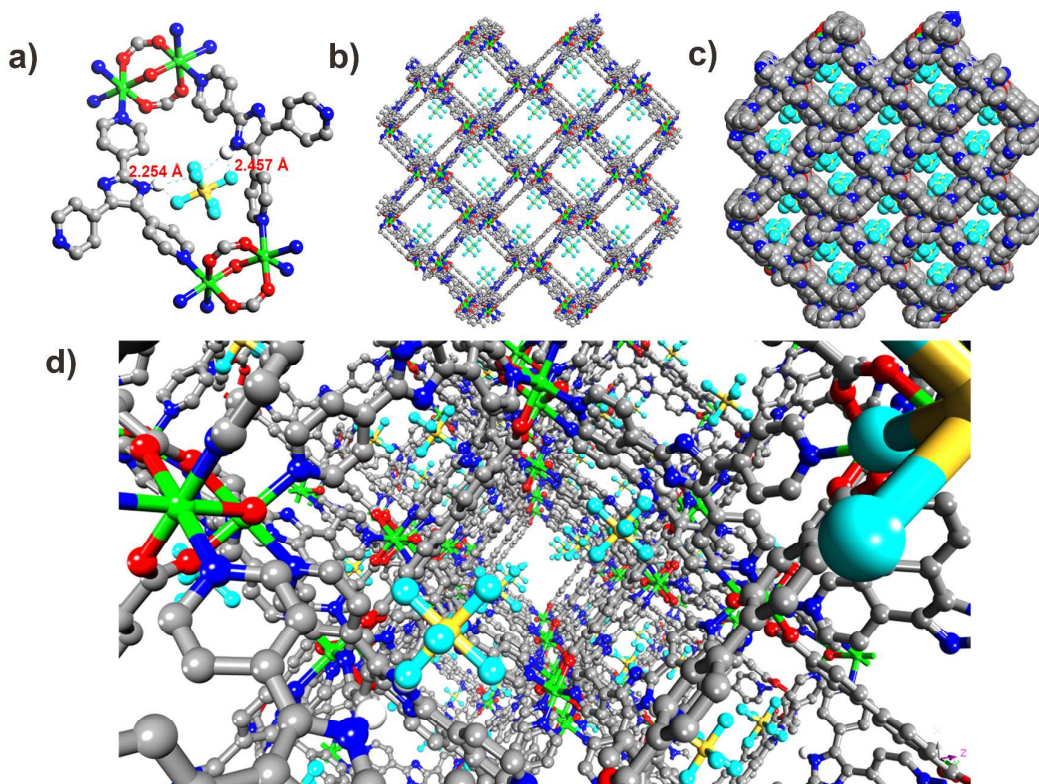

**Fig. S3** (a)  $[\text{SiF}_6]^-$  ion and hydrogen-bonded Htpim ligands. (b) (c) ball-and-stick models and CPK models of  $[\text{SiF}_6]^-$  ion in each channels. (d) the demonstration of the arrangement of the  $[\text{SiF}_6]^-$  ions in single channel.

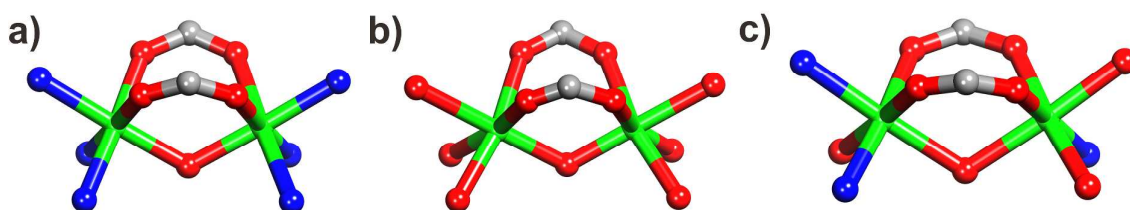

**Fig.S4** A brief exhibition of similar reported SBUs. (a) This work and  $[\text{Ni}_2(\mu_2\text{-OH})(\text{bdc})(\text{tpt})_2][\text{NO}_3] \cdot 3\text{DMA} \cdot 4\text{CH}_3\text{OH} \cdot 6\text{H}_2\text{O}$ .<sup>1</sup> Connected to two carboxyl groups and six nitrogen-containing ligands to form an eight-connected SBU. (b) CPM-24.<sup>2</sup> Connected to two carboxyl groups and six  $\text{H}_2\text{O}$  molecules to form a two-connected SBU. (c) CPM-16.<sup>3</sup> Connect to five carboxyl groups and three nitrogen-containing ligands to form an eight-connected SBU.

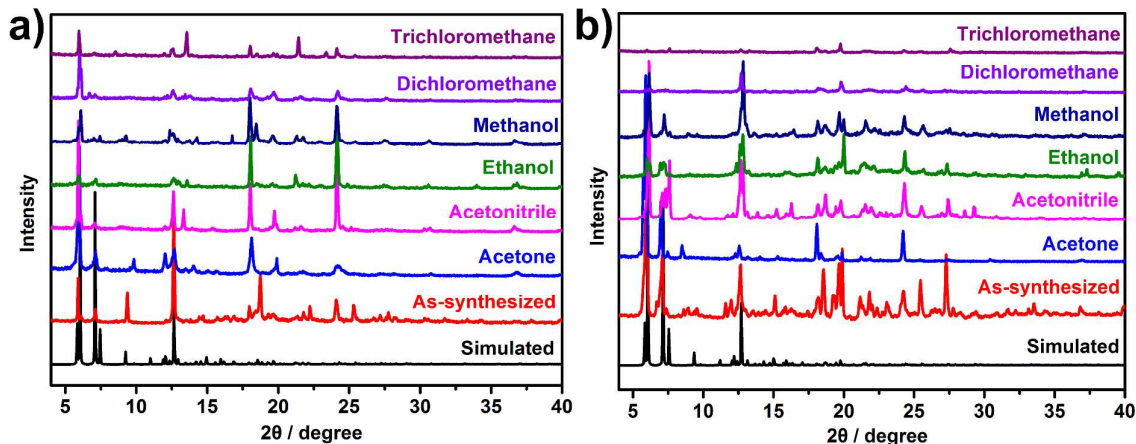

**Fig. S5** PXRD patterns of **JLU-Liu37** (a) and **JLU-Liu38** (b) for simulated, as-synthesized, and solvent-exchanged samples. **JLU-Liu37** was stable in common solvents, **JLU-Liu38** was relatively unstable in dichloromethane and trichloromethane.

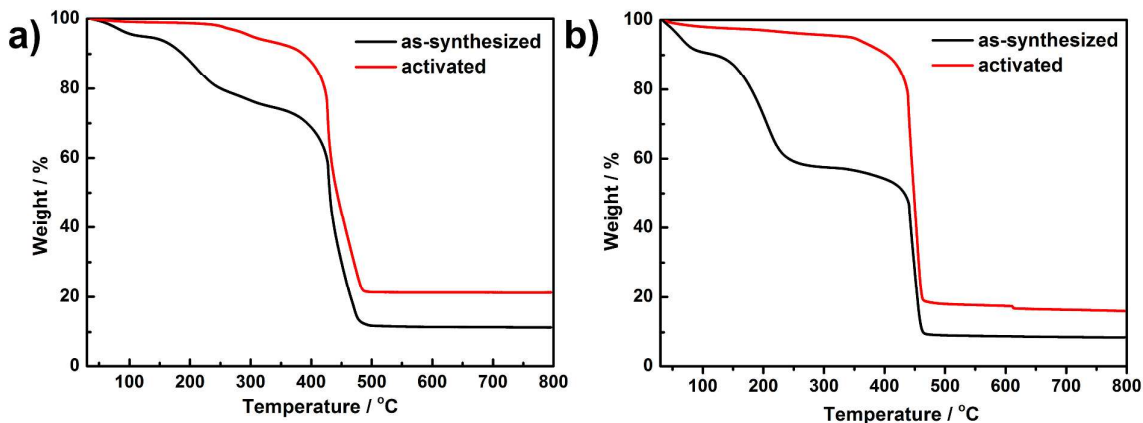

**Fig. S6** TGA curves of **JLU-Liu37** (a) and **JLU-Liu38** (b) for the as-synthesized and activated samples.

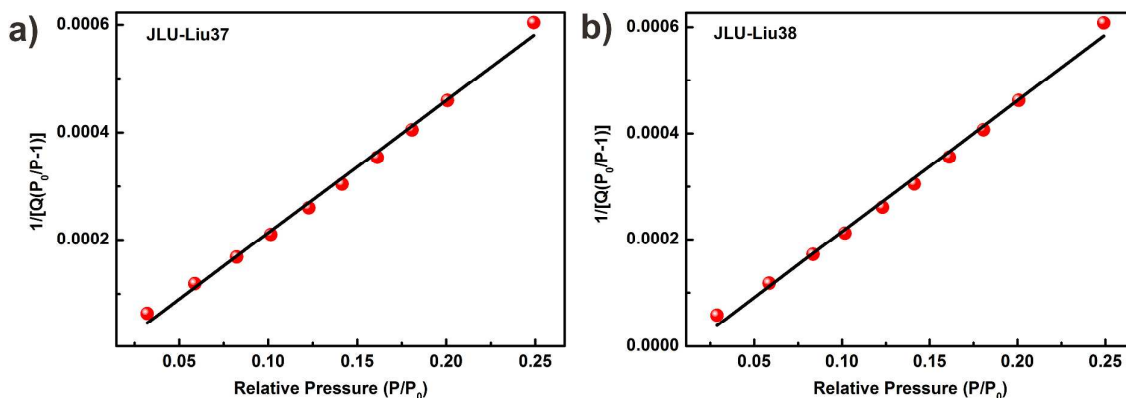

**Fig. S7** The linear fitting curve for calculating BET surface areas of (a) **JLU-Liu37** and (b) **JLU-Liu38**.



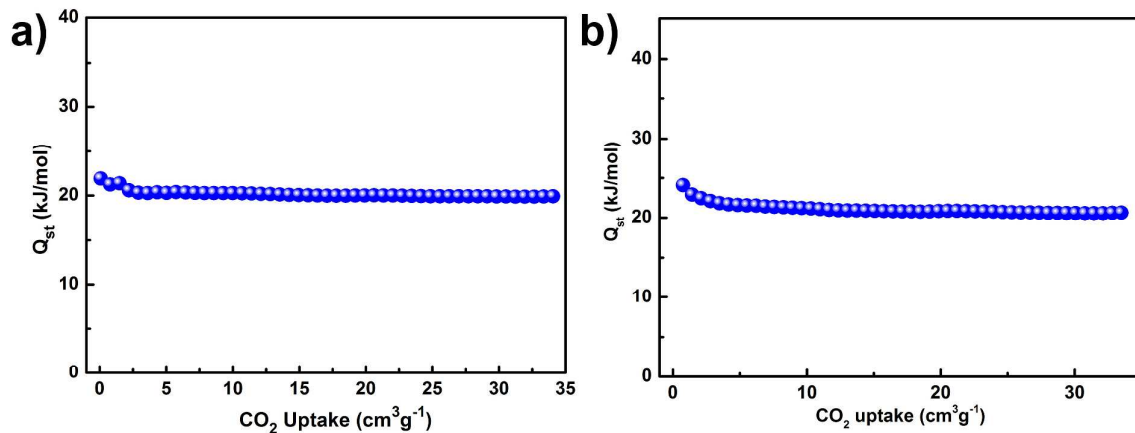

**Fig. S8.**  $Q_{st}$  of  $CO_2$  for JLU-Liu37 (a) and JLU-Liu38 (b).

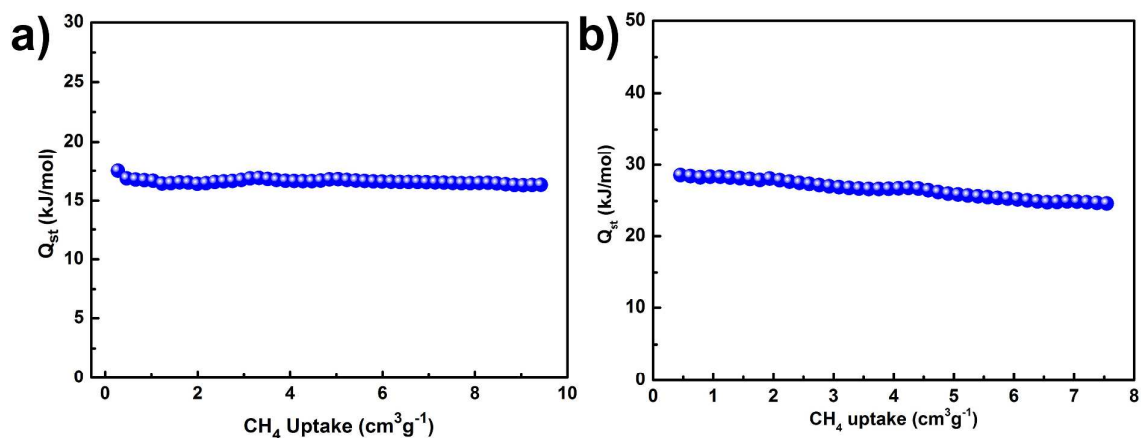

**Fig. S9.**  $Q_{st}$  of  $CH_4$  for JLU-Liu37 (a) and JLU-Liu38 (b).

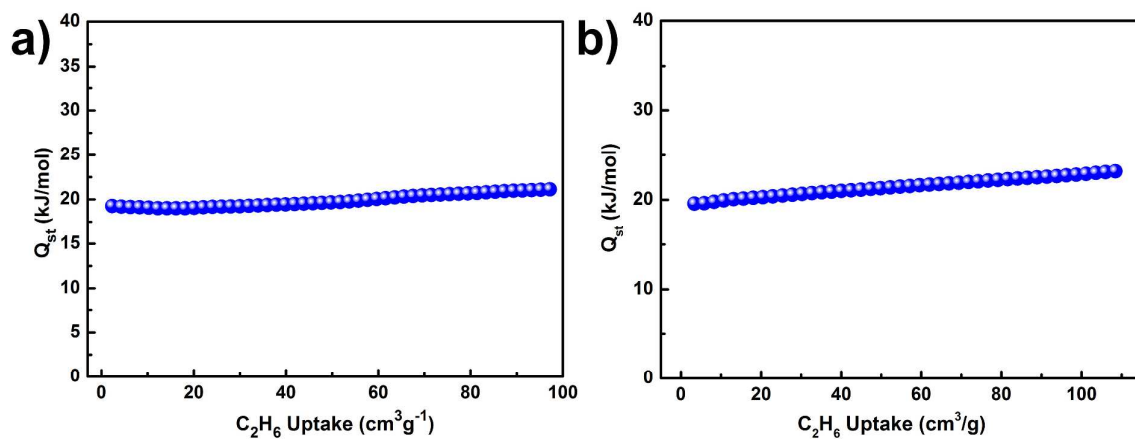

**Fig. S10.**  $Q_{st}$  of  $C_2H_6$  for JLU-Liu37 (a) and JLU-Liu38 (b).

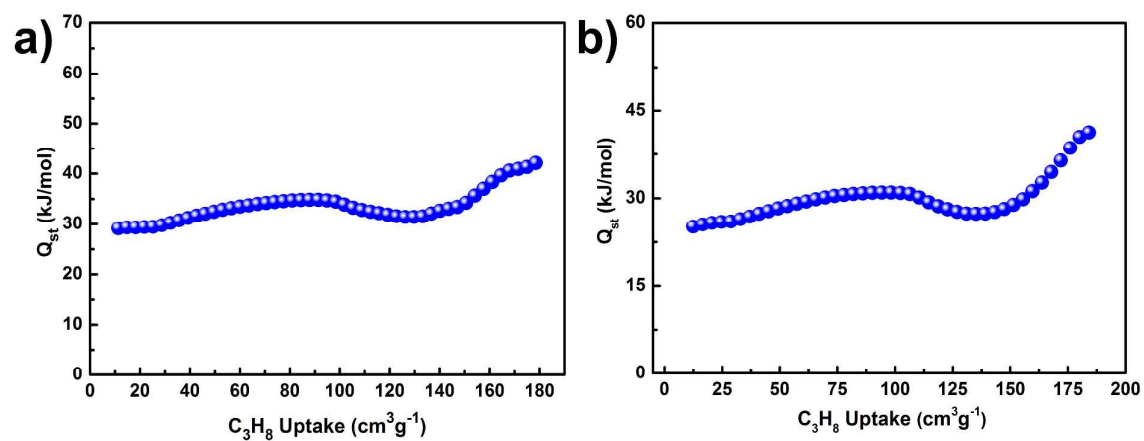

**Fig. S11.**  $Q_{st}$  of  $C_3H_8$  for JLU-Liu37 (a) and JLU-Liu38 (b).

### S3. Supporting Tables

**Table S1.** Crystal data and structure refinements for **JLU-Liu37** and **JLU-Liu38**.

| Compound                                                                    | <b>JLU-Liu37</b>                                                                                        | <b>JLU-Liu38</b>                                                                                         |
|-----------------------------------------------------------------------------|---------------------------------------------------------------------------------------------------------|----------------------------------------------------------------------------------------------------------|
| Formula                                                                     | C <sub>66.5</sub> H <sub>75.5</sub> Co <sub>2</sub> F <sub>6</sub> N <sub>13.5</sub> O <sub>11</sub> Si | C <sub>86</sub> H <sub>125.5</sub> F <sub>6</sub> N <sub>17.5</sub> Ni <sub>4</sub> O <sub>18.5</sub> Si |
| <i>M<sub>w</sub></i>                                                        | 1499.85                                                                                                 | 1960.04                                                                                                  |
| Temp (K)                                                                    | 296(2)                                                                                                  | 296(2)                                                                                                   |
| Wavelength (Å)                                                              | 0.71073                                                                                                 | 0.71073                                                                                                  |
| Crystal system                                                              | Orthorhombic                                                                                            | Orthorhombic                                                                                             |
| Space group                                                                 | Pnma                                                                                                    | Pnma                                                                                                     |
| <i>a</i> (Å)                                                                | 21.879(2)                                                                                               | 21.4817(9)                                                                                               |
| <i>b</i> (Å)                                                                | 23.701(3)                                                                                               | 23.3867(10)                                                                                              |
| <i>c</i> (Å)                                                                | 19.687(2)                                                                                               | 19.8758(8)                                                                                               |
| $\alpha$ (°)                                                                | 90                                                                                                      | 90                                                                                                       |
| $\beta$ (°)                                                                 | 90                                                                                                      | 90                                                                                                       |
| $\gamma$ (°)                                                                | 90                                                                                                      | 90                                                                                                       |
| <i>V</i> (Å <sup>3</sup> )                                                  | 10208.7(19)                                                                                             | 9985.3(7)                                                                                                |
| <i>Z</i> , <i>D<sub>C</sub></i> (Mg/m <sup>3</sup> )                        | 4, 0.976                                                                                                | 4, 1.304                                                                                                 |
| <i>F</i> (000)                                                              | 3116                                                                                                    | 4144                                                                                                     |
| $\theta$ range (deg)                                                        | 1.345 - 25.073                                                                                          | 1.345 - 25.095                                                                                           |
| reflns collected/unique                                                     | 63176 / 9269                                                                                            | 63784 / 9106                                                                                             |
| <i>R<sub>int</sub></i>                                                      | 0.1149                                                                                                  | 0.0479                                                                                                   |
| data/restraints/params                                                      | 9269 / 161 / 481                                                                                        | 9106 / 185 / 481                                                                                         |
| GOF on <i>F</i> <sup>2</sup>                                                | 1.203                                                                                                   | 1.297                                                                                                    |
| <i>R</i> <sup>1</sup> , <i>wR</i> <sup>2</sup> ( <i>I</i> > 2σ( <i>I</i> )) | 0.0919, 0.2995                                                                                          | 0.0788, 0.2835                                                                                           |
| <i>R</i> <sup>1</sup> , <i>wR</i> <sup>2</sup> (all data)                   | 0.1302, 0.3293                                                                                          | 0.0879, 0.2937                                                                                           |

Since the highly disordered guest molecules were trapped in the channels of **JLU-Liu37** and **JLU-Liu38** and could not be modeled properly, there is “Alert level A” about “Check Reported Molecular Weight” in the “checkCIF/PLATON report” files for **JLU-Liu37** and **JLU-Liu38**. The final formulas of **JLU-Liu37** and **JLU-Liu38** were derived from crystallographic data combined with elemental and thermogravimetric analysis data.



**Table S2.** Selected bond lengths [Å] and angles [°] for **JLU-Liu37**.

| <b>JLU-Liu37</b>    |            |                     |            |
|---------------------|------------|---------------------|------------|
| Co(1)-O(2)          | 2.016(2)   | O(3)-Co(1)-N(1)     | 177.97(17) |
| Co(1)-O(3)          | 2.058(4)   | O(1)-Co(1)-N(1)     | 88.38(17)  |
| Co(1)-O(1)          | 2.079(4)   | N(5)#1-Co(1)-N(1)   | 92.00(17)  |
| Co(1)-N(5)#1        | 2.169(5)   | N(4)#2-Co(1)-N(1)   | 92.56(18)  |
| Co(1)-N(4)#2        | 2.173(4)   | C(1A)-N(1)-Co(1)    | 119.6(9)   |
| Co(1)-N(1)          | 2.191(4)   | C(1B)-N(1)-Co(1)    | 117.3(8)   |
| N(4)-Co(1)#6        | 2.173(4)   | C(2B)-N(1)-Co(1)    | 128.4(11)  |
| N(5)-Co(1)#7        | 2.169(5)   | C(2A)-N(1)-Co(1)    | 123.6(8)   |
| O(2)-Co(1)#3        | 2.016(2)   | C(12B)-N(4)-Co(1)#6 | 120.6(7)   |
| O(2)-Co(1)-O(3)     | 94.57(16)  | C(12A)-N(4)-Co(1)#6 | 122.6(6)   |
| O(2)-Co(1)-O(1)     | 92.92(15)  | C(13B)-N(4)-Co(1)#6 | 122.4(6)   |
| O(3)-Co(1)-O(1)     | 91.98(17)  | C(13A)-N(4)-Co(1)#6 | 119.9(5)   |
| O(2)-Co(1)-N(5)#1   | 178.96(16) | C(17A)-N(5)-Co(1)#7 | 128.7(6)   |
| O(3)-Co(1)-N(5)#1   | 86.04(17)  | C(17B)-N(5)-Co(1)#7 | 121.8(6)   |
| O(1)-Co(1)-N(5)#1   | 86.21(16)  | C(18B)-N(5)-Co(1)#7 | 119.0(6)   |
| O(2)-Co(1)-N(4)#2   | 88.79(16)  | C(18A)-N(5)-Co(1)#7 | 117.0(6)   |
| O(3)-Co(1)-N(4)#2   | 87.03(18)  | C(19)-O(1)-Co(1)    | 132.8(4)   |
| O(1)-Co(1)-N(4)#2   | 178.08(17) | Co(1)#3-O(2)-Co(1)  | 118.0(2)   |
| N(5)#1-Co(1)-N(4)#2 | 92.08(17)  | C(28)#8-O(3)-Co(1)  | 134.9(4)   |
| O(2)-Co(1)-N(1)     | 87.40(16)  |                     |            |

Symmetry transformations used to generate equivalent atoms:

#1  $-x+1/2, -y+1, z-1/2$     #2  $x-1/2, y, -z+3/2$     #3  $x, -y+3/2, z$     #4  $x+1/2, y, -z+1/2$   
 #5  $x+1/2, -y+3/2, -z+1/2$     #6  $x+1/2, y, -z+3/2$     #7  $-x+1/2, -y+1, z+1/2$   
 #8  $x-1/2, y, -z+1/2$

**Table S3.** Selected bond lengths [Å] and angles [°] for **JLU-Liu38**.

| <b>JLU-Liu38</b>    |            |                     |            |
|---------------------|------------|---------------------|------------|
| Ni(1)-O(1)          | 1.9943(14) | O(3)-Ni(1)-N(1)     | 177.87(11) |
| Ni(1)-O(3)          | 2.039(2)   | O(2)-Ni(1)-N(1)     | 88.99(11)  |
| Ni(1)-O(2)          | 2.052(2)   | N(4)#1-Ni(1)-N(1)   | 91.95(12)  |
| Ni(1)-N(4)#1        | 2.105(3)   | N(5)#2-Ni(1)-N(1)   | 92.69(11)  |
| Ni(1)-N(5)#2        | 2.132(3)   | C(11B)-N(1)-Ni(1)   | 127.4(4)   |
| Ni(1)-N(1)          | 2.147(3)   | C(13A)-N(1)-Ni(1)   | 121.3(9)   |
| N(5)-Ni(1)#6        | 2.132(3)   | C(13B)-N(1)-Ni(1)   | 116.7(4)   |
| N(4)-Ni(1)#7        | 2.105(3)   | C(11A)-N(1)-Ni(1)   | 123.6(6)   |
| O(1)-Ni(1)#3        | 1.9942(14) | C(22A)-N(5)-Ni(1)#6 | 120.5(4)   |
| O(1)-Ni(1)-O(3)     | 93.80(10)  | C(22B)-N(5)-Ni(1)#6 | 127.1(4)   |
| O(1)-Ni(1)-O(2)     | 92.52(11)  | C(20A)-N(5)-Ni(1)#6 | 118.9(4)   |
| O(3)-Ni(1)-O(2)     | 91.71(11)  | C(20B)-N(5)-Ni(1)#6 | 117.8(4)   |
| O(1)-Ni(1)-N(4)#1   | 88.61(11)  | C(24B)-N(4)-Ni(1)#7 | 121.7(4)   |
| O(3)-Ni(1)-N(4)#1   | 87.32(12)  | C(26A)-N(4)-Ni(1)#7 | 124.3(4)   |
| O(2)-Ni(1)-N(4)#1   | 178.55(12) | C(24A)-N(4)-Ni(1)#7 | 118.4(4)   |
| O(1)-Ni(1)-N(5)#2   | 178.29(11) | C(26B)-N(4)-Ni(1)#7 | 120.7(3)   |
| O(3)-Ni(1)-N(5)#2   | 85.35(11)  | Ni(1)#3-O(1)-Ni(1)  | 119.71(14) |
| O(2)-Ni(1)-N(5)#2   | 86.03(11)  | C(10)-O(2)-Ni(1)    | 133.4(3)   |
| N(4)#1-Ni(1)-N(5)#2 | 92.83(11)  | C(5)-O(3)-Ni(1)     | 134.9(3)   |
| O(1)-Ni(1)-N(1)     | 88.18(11)  |                     |            |

Symmetry transformations used to generate equivalent atoms:

#1  $x-1/2, y, -z+1/2$     #2  $-x+1/2, -y+1, z-1/2$     #3  $x, -y+1/2, z$     #4  $x+1/2, y, -z-1/2$   
#5  $x-1/2, y, -z-1/2$     #6  $-x+1/2, -y+1, z+1/2$     #7  $x+1/2, y, -z+1/2$

**Table S4.** BVS calculation for **JLU-Liu37**.

| $\text{Co}^{2+}$                                                                               | $r_0$  | $r_{ij}$ | $B$  | $V_{ij}$ |
|------------------------------------------------------------------------------------------------|--------|----------|------|----------|
| Co(1) - O(2)                                                                                   | 1.6920 | 2.0156   | 0.37 | 0.417    |
| Co(1) - O(3)                                                                                   | 1.6920 | 2.0589   | 0.37 | 0.371    |
| Co(1) - O(1)                                                                                   | 1.6920 | 2.0793   | 0.37 | 0.351    |
| Co(1) - N(5)a                                                                                  | 1.6500 | 2.1682   | 0.37 | 0.246    |
| Co(1) - N(4)f                                                                                  | 1.6500 | 2.1725   | 0.37 | 0.244    |
| Co(1) - N(1)                                                                                   | 1.6500 | 2.1903   | 0.37 | 0.232    |
| $V_{\text{Co}} = \sum V_{ij} = 1.861 \quad V_{\text{O1}} = 2 \times V_{\text{Co1-O2}} = 0.834$ |        |          |      |          |
| $\text{Co}^{3+}$                                                                               | $r_0$  | $r_{ij}$ | $B$  | $V_{ij}$ |
| Co(1) - O(2)                                                                                   | 1.6370 | 2.0156   | 0.37 | 0.359    |
| Co(1) - O(3)                                                                                   | 1.6370 | 2.0589   | 0.37 | 0.320    |
| Co(1) - O(1)                                                                                   | 1.6370 | 2.0793   | 0.37 | 0.303    |
| Co(1) - N(5)a                                                                                  | 1.7500 | 2.1682   | 0.37 | 0.323    |
| Co(1) - N(4)f                                                                                  | 1.7500 | 2.1725   | 0.37 | 0.319    |
| Co(1) - N(1)                                                                                   | 1.7500 | 2.1903   | 0.37 | 0.304    |
| $V_{\text{Co}} = \sum V_{ij} = 1.928 \quad V_{\text{O1}} = 2 \times V_{\text{Co1-O2}} = 0.718$ |        |          |      |          |

**Table S5.** BVS calculation for **JLU-Liu38**.

| $\text{Ni}^{2+}$                                                                               | $r_0$  | $r_{ij}$ | $B$  | $V_{ij}$ |
|------------------------------------------------------------------------------------------------|--------|----------|------|----------|
| Ni(1) - O(1)                                                                                   | 1.6540 | 1.9924   | 0.37 | 0.401    |
| Ni(1) - O(3)                                                                                   | 1.6540 | 2.0435   | 0.37 | 0.349    |
| Ni(1) - O(2)                                                                                   | 1.6540 | 2.0453   | 0.37 | 0.347    |
| Ni(1) - N(4)c                                                                                  | 1.7000 | 2.1092   | 0.37 | 0.331    |
| Ni(1) - N(5)a                                                                                  | 1.7000 | 2.1312   | 0.37 | 0.312    |
| Ni(1) - N(1)                                                                                   | 1.7000 | 2.1382   | 0.37 | 0.306    |
| $V_{\text{Ni}} = \sum V_{ij} = 2.046 \quad V_{\text{O1}} = 2 \times V_{\text{Ni1-O1}} = 0.802$ |        |          |      |          |
| $\text{Ni}^{3+}$                                                                               | $r_0$  | $r_{ij}$ | $B$  | $V_{ij}$ |
| Ni(1) - O(1)                                                                                   | 1.7500 | 1.9924   | 0.37 | 0.519    |
| Ni(1) - O(3)                                                                                   | 1.7500 | 2.0435   | 0.37 | 0.452    |
| Ni(1) - O(2)                                                                                   | 1.7500 | 2.0453   | 0.37 | 0.450    |
| Ni(1) - N(4)c                                                                                  | 1.7310 | 2.1092   | 0.37 | 0.360    |
| Ni(1) - N(5)a                                                                                  | 1.7310 | 2.1312   | 0.37 | 0.339    |
| Ni(1) - N(1)                                                                                   | 1.7310 | 2.1382   | 0.37 | 0.333    |
| $V_{\text{Ni}} = \sum V_{ij} = 2.453 \quad V_{\text{O1}} = 2 \times V_{\text{Ni1-O1}} = 1.038$ |        |          |      |          |

**Table S6.** The refined parameters for the Dual-site Langmuir-Freundlich equations fit for the pure isotherms of CO<sub>2</sub>, CH<sub>4</sub>, C<sub>2</sub>H<sub>6</sub> and C<sub>3</sub>H<sub>8</sub> for **JLU-Liu37** and **JLU-Liu38** at 298 K.

|                  |                               | q <sub>m1</sub> | b <sub>1</sub> | 1/n <sub>1</sub> | q <sub>m2</sub> | b <sub>2</sub> | 1/n <sub>2</sub> | R <sup>2</sup> |
|------------------|-------------------------------|-----------------|----------------|------------------|-----------------|----------------|------------------|----------------|
| <b>JLU-Liu37</b> | CO <sub>2</sub>               | 21.00624        | 1.47407E-4     | 1.29768          | 0.59278         | 0.0205         | 0.93062          | 0.99999        |
|                  | CH <sub>4</sub>               | 4.30715         | 2.92609E-4     | 1.23828          | 0.05502         | 0.03168        | 1.17375          | 0.99997        |
|                  | C <sub>2</sub> H <sub>6</sub> | 10.55407        | 1.53143E-4     | 1.73697          | 1.49671         | 0.02343        | 1.03101          | 0.99999        |
|                  | C <sub>3</sub> H <sub>8</sub> | 3.46729         | 2.05201E-4     | 3.51135          | 5.10466         | 0.04579        | 1.08797          | 0.99996        |
| <b>JLU-Liu38</b> | CO <sub>2</sub>               | 0.19515         | 0.02279        | 1.29841          | 18.06472        | 3.47078E-4     | 1.2315           | 0.99998        |
|                  | CH <sub>4</sub>               | 25.26696        | 8.23853E-5     | 1.07915          | 0.00602         | 0.09287        | 1.19406          | 0.99991        |
|                  | C <sub>2</sub> H <sub>6</sub> | 31.2193         | 8.85383E-4     | 1.16141          | 0.05258         | 1.00724        | 0.94613          | 0.99993        |
|                  | C <sub>3</sub> H <sub>8</sub> | 3.86751         | 3.33009E-4     | 3.59573          | 5.15451         | 0.05477        | 1.04323          | 0.99998        |

## REFERENCES

- (1) Zhang, L.; Qian, J.; Yang, W.; Kuang, X.; Zhang, J.; Cui, Y.; Wu, W.; Wu, X.; Lu, C.; Chen, W. A (3,8)-Connected Metal-Organic Framework with a Unique Binuclear [Ni<sub>2</sub>(μ<sub>2</sub>-OH)(COO)<sub>2</sub>] Node for High H<sub>2</sub> and CO<sub>2</sub> Adsorption Capacities. *J. Mater. Chem. A* **2015**, 15399–15402.
- (2) Zheng, S. T.; Mao, C.; Wu, T.; Lee, S.; Feng, P.; Bu, X. Generalized Synthesis of Zeolite-Type Metal-Organic Frameworks Encapsulating Immobilized Transition-Metal Clusters. *J. Am. Chem. Soc.* **2012**, 134, 11936-11939.
- (3) Zheng, S. T.; Wu, T.; Irfanoglu, B.; Zuo, F.; Feng, P.; Bu, X. Multicomponent Self-Assembly of a Nested Co<sub>24</sub>@Co<sub>48</sub> Metal-Organic Polyhedral Framework. *Angew. Chem., Int. Ed.* **2011**, 50, 8034-8037.
